# Supplementary material for: Effects of Community-Led Total Sanitation (CLTS) Boosting and Household Factors on Latrine Ownership in Siaya County, Kenya
Source: MDPI journal article supplement (doi:10.3390/ijerph20186781), 2023-09-18
Supplement: s1 [file s1]

## HOUSEHOLD QUESTIONNAIRE & REGISTRATION

### GENERAL INFORMATION

#### CONSENT

#### ENSURE CONSENT IS OBTAINED AND SIGNED

Consent

Yes = 1

No = 0

Questionnaire Code: \_ \_ \_ \_ \_

Date of interview (dd/mm/yyyy)     \_ / \_ / \_

Time of interview \_\_\_\_\_

Household Code: \_\_\_\_\_

**Ask to speak with the Head of the Household. If they are unavailable, ask to speak with:**

**1-female head of household, 2-adult child, 3-grandparent.**

Sub County: \_\_\_\_\_

Village cluster and Name: \_\_\_\_\_

### HOUSEHOLD BACKGROUND INFORMATION

1. How many households are in this compound? \_\_\_\_\_ Households
2. How many people live in this compound? \_\_\_\_\_ People
3. What village do you live in? \_\_\_\_\_
4. How many primary school age children between the ages of 5 and 18 years live in this household? \_\_\_\_\_ children

**Please fill in table for above children**

| Age<br>(years) | Sex<br>M=1<br>F=2 | Does<br>s/he<br>attend<br>school?<br>(Y/N) | Has s/he had any<br>of the following in<br>the past week?<br><b>O?</b><br>(read options)<br>1-Diarrhea<br>2-Intest. Worms<br>3-Typhoid<br>4-Amoeba<br>5-Others_____ | Has s/he missed<br>school in the past<br>two weeks?<br>(Y/N/DK) | Why has s/he<br>missed school in<br>the past two<br>weeks?<br>1 – illness<br>2 – work<br>3 – taking care of<br>sibling<br>4 – caring for sick<br>family member | If illness, what type of<br>illness?<br>1 – Diarrhea<br>2 – Stomachache<br>3 – Malaria<br>4 – Cough<br>5 – Typhoid<br>6 – vomiting<br>7 - Headache<br>8- Other_____ |
|----------------|-------------------|--------------------------------------------|---------------------------------------------------------------------------------------------------------------------------------------------------------------------|-----------------------------------------------------------------|----------------------------------------------------------------------------------------------------------------------------------------------------------------|---------------------------------------------------------------------------------------------------------------------------------------------------------------------|
|----------------|-------------------|--------------------------------------------|---------------------------------------------------------------------------------------------------------------------------------------------------------------------|-----------------------------------------------------------------|----------------------------------------------------------------------------------------------------------------------------------------------------------------|---------------------------------------------------------------------------------------------------------------------------------------------------------------------|

|  |  |  |  |  |                 |  |
|--|--|--|--|--|-----------------|--|
|  |  |  |  |  | 5 – other _____ |  |
|  |  |  |  |  |                 |  |
|  |  |  |  |  |                 |  |

5. How many children under 5 years of age live in this household? *Record number in household*

\_\_\_\_\_ number of children

**Please fill in below table for above children**

| Age<br>(months) | Sex<br>(M/F) | Has s/he had any<br>of the following in<br>the past week?<br>(read responses)<br>1-Diarrhea<br>2-Cough<br>3-Feaver<br>4-Vomiting | Has s/he<br>had diarrhea<br>in the past<br>week??<br>1) Yes<br>2) No<br>3) DK | Was there<br>blood in the<br>stool?<br>1) Yes<br>2) No<br>3) DK | Did s/he visit<br>the clinic in the<br>past two<br>weeks?<br>1) Yes<br>2) No<br>3) DK | Did s/he visit the clinic<br>because of diarrhea in the<br>past two weeks?<br>1) Yes<br>2) No<br>3) DK |
|-----------------|--------------|----------------------------------------------------------------------------------------------------------------------------------|-------------------------------------------------------------------------------|-----------------------------------------------------------------|---------------------------------------------------------------------------------------|--------------------------------------------------------------------------------------------------------|
|                 |              |                                                                                                                                  |                                                                               |                                                                 |                                                                                       |                                                                                                        |
|                 |              |                                                                                                                                  |                                                                               |                                                                 |                                                                                       |                                                                                                        |

6. How many people live in this household? *(The definition of a household is people eating from the same kitchen/pot) Record number in household*

\_\_\_\_\_ Number of people

7. Respondent sex **(DON'T ASK, CIRCLE CORRECT RESPONSE)**

1) Male

2) Female

How old are you? \_\_\_\_\_

**Complete the following table:**

| Age? ( <i>record age or status</i> )<br>=deceased<br>=N/A | Marital Status<br>1=Married<br>2=Single<br>3=Separated<br>4=Widowed<br>5=Divorced<br>6=N/A | Highest level of<br>education<br>0=no education<br>1=some primary<br>2=finished primary<br>3=some secondary<br>4=finished secondary<br>5=some tertiary | Able to<br>read?<br>1) yes<br>2) no | Has s/he had diarrhea<br>in the past week?<br>1) yes<br>2) no<br>3) DK |
|-----------------------------------------------------------|--------------------------------------------------------------------------------------------|--------------------------------------------------------------------------------------------------------------------------------------------------------|-------------------------------------|------------------------------------------------------------------------|
|                                                           |                                                                                            |                                                                                                                                                        |                                     |                                                                        |

|                      |  |  |                                                       |  |  |
|----------------------|--|--|-------------------------------------------------------|--|--|
|                      |  |  | 6=completed cert.,<br>diploma, higher<br>diploma, etc |  |  |
| Male head of<br>HH   |  |  |                                                       |  |  |
| Female head of<br>HH |  |  |                                                       |  |  |

### **SANITATION INFORMATION**

*Now I am going to ask you a few questions about sanitation and personal hygiene.*

8. Do you have a toilet facility in this compound?

- 1) Yes ▶ skip to Q11
- 2) No

9. Why is there no toilet in this compound? *(Multiple responses possible)*

- 1) Can't afford it
- 2) Soil too loose / rocky
- 3) Do not need one
- 4) Collapsed
- 5) Full
- 6) Prefer outdoors
- 6) Other, specify \_\_\_\_\_

10. Where do you go to make a long call (defecate) if you don't have a latrine at home?

- 1) On compound grounds somewhere
- 2) Behind the latrine
- 3) Friend's house
- 4) Public latrine
- 5) Neighbor's house
- 6) Bush/field
- 7) Other, specify: \_\_\_\_\_

11. If you have visitors, where do they go for a long call (defecate) if you don't have a latrine at home?

- 1) On compound grounds somewhere
- 2) Behind the latrine
- 3) Friend's house
- 4) Public latrine
- 5) Neighbor's house
- 6) Bush/field
- 7) Other, specify

12. How many latrines on this compound are currently being used? \_\_\_\_\_ functioning latrines

**If more than one facility is functioning in the compound note them down and who uses them**

13. Do you share this/these toilet(s) with other households?

- 1) Yes
- 2) No

14. How many other households use this/these toilet(s)? \_\_\_\_\_ households

15. When did you build this latrine (Ask only if latrine is observed)?

\_\_\_\_\_ months ago (*conversion to years*)

\_\_\_\_\_ years ago

\_\_\_\_\_ Don't know

16. When was the last time this/these toilet(s) was/were improved or constructed?

\_\_\_\_\_ months ago (*conversion to years*)

\_\_\_\_\_ years ago

\_\_\_\_\_ Don't know

17. Is there anyone in this household, including children, who does not regularly use the latrine?

- 1) Yes
- 2) No

18. Who doesn't regularly use the latrine? (*multiple responses possible*)

Children <2 years

Children <5 years

Children 5 – 15 years

Female adults

Male adults

No one uses latrine

Other \_\_\_\_\_

19. Why do these people not use the latrine?

Children too small

No latrine at home

Not well kept

Distance from the compound

Fear, dislike

Other \_\_\_\_\_

20. How do you dispose of the feces of your child/children under 5 years?

1) Leave it in the yard / do nothing

2) Put in the latrine

3) Bury it

5) Other, specify \_\_\_\_\_

6) Don't know

21. Have you ever heard of community led total sanitation (CLTS)?

1) yes

2) No

If yes, can you describe for me what it is

\_\_\_\_\_

22. Have you attended any of CLTS training sessions?

1) Yes

2) No ▶ skip to Q 42

23. Who facilitated the CLTS training session in this village?

1) Government officers (public health officers)

2) None Governmental Organization

3) Other, \_\_\_\_\_

24. In your opinion, do you think CLTS is helping your village to have latrines?

1) Yes

2) No

25. Do you think CLTS is a good intervention to help people build latrines in your village?

1) Yes

2) No

Why do you say so? \_\_\_\_\_

26. In your opinion, what worked well during the CLTS triggering sessions?

Transect walk/mapping of open defecation areas

Shit calculation

Medical expenses calculation

Demonstration on disease pathways

Other, Specify \_\_\_\_\_

27. In your opinion, what did not work well during the CLTS triggering sessions?

Transect walk/mapping of open defecation areas

Shit calculation

Medical expenses calculation

Demonstration on disease pathways

Other, Specify \_\_\_\_\_

28. What did you like most about the CLTS process?

Transect walk/mapping of open defecation areas

Shit calculation

Medical expenses calculation

Demonstration on disease pathways

Other, Specify \_\_\_\_\_

29. What did you not like most about the CLTS process?

Transect walk/mapping of open defecation areas

Shit calculation

Medical expenses calculation

Demonstration on disease pathways

Other, Specify \_\_\_\_\_

30. Did you ever built/construct a latrine after the CLTS training?

1) Yes

2) No

31. What made you built/construct a latrine? \_\_\_\_\_

32. Are you satisfied with the type of latrine you have constructed?

1. Very satisfied 2. Satisfied 3. Not satisfied 4. Don't Know

33. Which type of latrine would you prefer?
- 1) VIP latrine
  - 2) Water closet
  - 3) Ecosan
  - 4) Sanplat
  - 5) Other, describe \_\_\_\_\_
34. Where you ever told about the types of latrines to construct?
- 1) Yes
  - 2) No
35. Did you have a latrine prior to the CLTS training/triggering?
- 1) Yes
  - 2) No
36. Were you ever told about punishment to those who do not have or build latrine?
- 1) Yes
  - 2) No
37. What are the forms of punishment practiced in this village to those who do not have latrines? .....
- .....
38. Does the punishment make them build latrines?
39. Has there been follow ups after the CLTS training
- 1) Yes
  - 2) No
40. How frequent are the follow-ups
- 1) Very frequent
  - 2) Once a month
  - 3) Not frequent
  - 4) Don't Know
  - 5) Never
41. How are you currently using the information obtained during CLTS training?
42. Do you think the construction of latrines helps in prevention of diseases?
- 1) Yes
  - 2) No
43. Can you name for me some of these diseases?
- 1) Diarrhea
  - 2) Typhoid

- 3) Cholera
- 4) Intestinal worms
- 5) Other, Specify \_\_\_\_\_

44. Why do you think people practice open defecation in this village?

## HOUSEHOLD / DWELLING INFORMATION

Now I am going to ask you a few questions about your household and dwelling.

45. What type of fuel does your household **mainly** use for cooking? (*Choose one*)

- Electricity
- Natural Gas
- Biogas
- Paraffin / Kerosene
- Charcoal
- Firewood / straw
- Dung
- Other \_\_\_\_\_

46. What is the primary method for lighting the household dwelling(s)? (*This is lighting in the main room, NOT in the kitchen. Choose one*)

- 1) Paraffin (tin and wick)
- 2) Paraffin (Hurricane lantern)
- 3) Electricity
- 4) Solar lamp
- 5) Pressure lamp
- 6) Gas
- 7) Other, specify \_\_\_\_\_

47. How many of the following does the household own? (*Write the number owned next to each asset. Read SENSITIVELY*)

| <i>Type of animal</i> | <i>Number owned</i> |
|-----------------------|---------------------|
| Poultry               |                     |
| Cattle                |                     |
| Goats                 |                     |
| Sheep                 |                     |
| Pigs                  |                     |
| Donkeys               |                     |
| Other, Specify        |                     |

48. Which of the following items does the household have in working order?

|                     |     |    |
|---------------------|-----|----|
| Mobile/telephone    | Yes | No |
| Television          | Yes | No |
| Sewing Machine      | Yes | No |
| Posho Mill          | Yes | No |
| Ox-Plough           | Yes | No |
| Gas/Electric cooker | Yes | No |
| Bicycle             | Yes | No |
| Radio               | Yes | No |
| Motorcycle          | Yes | No |
| Motor vehicle       | Yes | No |
| Boat                | Yes | No |
| Other, specify      |     |    |

## OBSERVATION

Main roofing wall and floor material for the household's dwelling (*if more than one building in compound, list the structure that the interviewee lives in*):

### Roof

- 1) Grass thatch
- 2) Cement
- 3) Tiles
- 4) Timber
- 5) Iron sheet
- 6) Asbestos sheets

### Wall

- 1) Mud
- 2) Cement
- 3) Bricks / Blocks
- 4) Timber
- 5) Metal/iron sheet

### Floor

- 1) Dung / Earthen
- 2) Cement / plaster
- 3) Tile
- 4) Timber

State of repair of the dwelling

- 1) Completely dilapidated/ not livable
- 2) Needs major repairs
- 3) Needs no repairs / minor repairs
- 4) Being repaired now
- 5) New home/ under construction

Observed feces around compound.

1) Yes 2) No

Can you please show me the types of latrines that you are using?

Number of functioning latrines observed around compound \_\_\_\_\_ "doors"

Type of toilet facility in compound. If more than one, determine newest facility.

Flush Toilet

Traditional Pit Latrine

Traditional Pit with EcoSan

Ventilated Improved Pit Latrine

Ventilated Improved Pit with Ecosan

No Facility / Bush / Field

Above ground vault

Slab only

Other Specify \_\_\_\_\_

Condition of the latrine most frequently used by members of the household

|                |              |                   |                     |
|----------------|--------------|-------------------|---------------------|
| Smell          | 1) No smell  | 2) smell inside   | 3) smell outside    |
| Cleanliness    | 1) Clean     | 2) Slightly dirty | 3) Feces/Very dirty |
| Flies          | 1) No flies  | 2) A few flies    | 3) Many flies       |
| Superstructure | 1) No cracks | 2) Cracks         | 3) Visible holes    |

Condition of slab 1) No cracks 2) Some cracks 3) Pit visible

Door 1) Door closes completely 2) Door closes, but not completely 3) No door

Does the latrine hole have a separate lid? 1) Yes 2) No

Was the lid covering the hole at the time of the site visit? 1) Yes 2) No

Is the pit partially full or almost full?

- 1) Pit is empty or nearly empty
- 2) Pit is partially full w/ feces
- 3) Feces are visible at or near the top of the pit
- 4) Not applicable

Describe the materials used to construct the latrines \_\_\_\_\_

**Thank you for your time. Do you have any questions?**
