# Supplementary material for: Effects of Community-Led Total Sanitation (CLTS) Boosting and Household Factors on Latrine Ownership in Siaya County, Kenya
Source: MDPI journal article supplement (doi:10.3390/ijerph20186781), 2023-09-18
Supplement: s1 [file s1]

## HOUSEHOLD QUESTIONNAIRE

### GENERAL INFORMATION

The purpose of this data collection is to follow up on a previous household registration/baseline data collection. The baseline information collected includes those who have and those who do not have latrines. For this follow up exercise, we will only collect information from those who attended CLTS triggering sessions/trainings in the community.

### CONSENT

#### ***ENSURE CONSENT IS OBTAINED AND SIGNED***

Consent

Yes = 1

No = 0

Questionnaire Code: \_ \_ \_ \_ \_

Date of interview (dd/mm/yyyy)    \_ \_ / \_ \_ / \_ \_

Time of interview \_ \_ \_ \_ \_

Compound/Household Code: \_ \_ \_ \_ \_

Sub County: \_ \_ \_ \_ \_

Village cluster and Name: \_ \_ \_ \_ \_

**Ask to speak with the Head of the Household.**

### HOUSEHOLD BACKGROUND INFORMATION

1. How many households are in this compound? \_ \_ \_ \_ \_ Households
2. How many people live in this compound? \_ \_ \_ \_ \_ People
3. How many children under 5 years of age live in this household? *Record number in household*  
\_ \_ \_ \_ \_ number of children

**Please fill in below table for above children**

| Age<br>(months) | Sex<br>(M/F) | Has s/he had any<br>of the following in<br>the past week?<br>(read responses)<br>1-Diarrhea<br>2-Cough<br>3-Fever<br>4-Vomiting | Has s/he<br>had diarrhea<br>in the past<br>week??<br>1) Yes<br>2) No<br>9) DK | Was there<br>blood in the<br>stool?<br>1) Yes<br>2) No<br>9) DK | Did s/he visit<br>the clinic in the<br>past two<br>weeks?<br>1) Yes<br>2) No<br>9) DK | Did s/he visit the clinic<br>because of diarrhea in<br>the past two weeks?<br>1) Yes<br>2) No<br>9) DK |
|-----------------|--------------|---------------------------------------------------------------------------------------------------------------------------------|-------------------------------------------------------------------------------|-----------------------------------------------------------------|---------------------------------------------------------------------------------------|--------------------------------------------------------------------------------------------------------|
|                 |              |                                                                                                                                 |                                                                               |                                                                 |                                                                                       |                                                                                                        |
|                 |              |                                                                                                                                 |                                                                               |                                                                 |                                                                                       |                                                                                                        |
|                 |              |                                                                                                                                 |                                                                               |                                                                 |                                                                                       |                                                                                                        |
|                 |              |                                                                                                                                 |                                                                               |                                                                 |                                                                                       |                                                                                                        |
|                 |              |                                                                                                                                 |                                                                               |                                                                 |                                                                                       |                                                                                                        |
|                 |              |                                                                                                                                 |                                                                               |                                                                 |                                                                                       |                                                                                                        |
|                 |              |                                                                                                                                 |                                                                               |                                                                 |                                                                                       |                                                                                                        |
|                 |              |                                                                                                                                 |                                                                               |                                                                 |                                                                                       |                                                                                                        |
|                 |              |                                                                                                                                 |                                                                               |                                                                 |                                                                                       |                                                                                                        |
|                 |              |                                                                                                                                 |                                                                               |                                                                 |                                                                                       |                                                                                                        |

**4.** How many people live in this household? *(The definition of a household is people eating from the same kitchen/pot)* Record number in household

\_\_\_\_\_ Number of people

**5.** Respondent sex **(DON'T ASK, CIRCLE CORRECT RESPONSE)** *(Please ensure you speak to the household head)*

1) Male

2) Female

How old are you? \_\_\_\_\_

**Complete the following table:**

|                                       | Age? ( <i>record age or status</i> )<br>=deceased<br>=N/A | Marital Status<br>1=Married<br>2=Single<br>3=Separated<br>4=Widowed<br>5=Divorced<br>6=N/A | Highest level of education<br>0=no education<br>1=some primary<br>2=finished primary<br>3=some secondary<br>4=finished secondary<br>5=some tertiary<br>6=completed cert., diploma, higher diploma, etc | Able to read?<br>1) yes<br>2) no | Has s/he had diarrhea in the past week?<br>1) yes<br>2) no<br>3) DK |
|---------------------------------------|-----------------------------------------------------------|--------------------------------------------------------------------------------------------|--------------------------------------------------------------------------------------------------------------------------------------------------------------------------------------------------------|----------------------------------|---------------------------------------------------------------------|
| Male head of HH                       |                                                           |                                                                                            |                                                                                                                                                                                                        |                                  |                                                                     |
| Female head of HH                     |                                                           |                                                                                            |                                                                                                                                                                                                        |                                  |                                                                     |
| Others (specify e.g child headed etc) |                                                           |                                                                                            |                                                                                                                                                                                                        |                                  |                                                                     |

### **CLTS/SANITATION INFORMATION**

*Now I am going to ask you a few questions about sanitation and personal hygiene.*

6. Have you ever heard of community led total sanitation (CLTS)?

- 1) yes
- 2) No

If yes, can you describe for me what it is \_\_\_\_\_

7. Have you or any member of your family attended any of CLTS training sessions?

- 1) Yes
- 2) No

If yes, when was this? ..... (state the month and year)

8. Who attended the CLTS training/triggering session?

- 1) My husband
- 2) My wife
- 3) My child (How old was the child \_\_\_\_\_ years)
- 4) Nobody
- 5) Others (specify) \_\_\_\_\_

9. Who facilitated/implemented the CLTS training/triggering session in this village?

- 1) Government officers (public health officers)
- 2) Nongovernmental Organization
- 3) Other, (specify) \_\_\_\_\_

10. Which language did the facilitators use during the CLTS training/triggering session?

- 1) Dholuo
- 2) Kiswahili
- 3) English
- 4) Other, specify. \_\_\_\_\_

11. Did you ever build a latrine after the CLTS training/triggering session?

- 1) Yes
- 2) No  skip to Q 16

If yes, after how long? \_\_\_\_\_ Days (after triggering)

12. What made you to build the latrine?

---

---

---

13. Is the latrine still present? (Observe presence of latrine)

- 1) Yes  skip to Q 15
- 2) No

If No, what happened to the latrine you built? \_\_\_\_\_

---

14. Why have you not built another latrine? \_\_\_\_\_

---

---

15. Is the latrine being used by all the members of the family?

- 1) Yes
- 2) No

If No, who is not using and why?

---

16. Do you think CLTS is a good intervention to help people build latrines in your village?

- 1) Yes
- 2) No

Why do you say so? \_\_\_\_\_

17. In your opinion, what worked well during the CLTS triggering sessions?

- 1) Transect walk/mapping of open defecation areas
- 2) Shit calculation
- 3) Medical expenses calculation
- 4) Demonstration on disease pathways
- 5) Other, Specify \_\_\_\_\_

Why do you say so?

\_\_\_\_\_

---

18. In your opinion, what did not work well during the CLTS triggering sessions?

- 1) Transect walk/mapping of open defecation areas
- 2) Shit calculation
- 3) Medical expenses calculation
- 4) Demonstration on disease pathways
- 5) Other, Specify \_\_\_\_\_

Why do you say so? \_\_\_\_\_

19. Are you satisfied with the type of latrine you have constructed?

- 1. Very satisfied    2. Satisfied    3. Not satisfied    4. Don't Know

20. Which type of latrine would you prefer?

- 1) VIP latrine
- 2) Water closet
- 3) Ecosan
- 4) Sanplat
- 5) Other, describe \_\_\_\_\_

21. Did you have a latrine prior to the CLTS training/triggering session?

1) Yes

2) No

22. Were you ever told about the types of latrines to construct?

1) Yes

2) No

23. Were you ever told about punishment to those who do not have or build latrine?

1) Yes

2) No

24. What are the forms of punishment were you told?

---

---

---

25. What forms of punishment are being practiced in this village to those who do not have

latrines? .....  
.....

26. Were you ever punished for not building a latrine?

1) Yes

2) No

If yes, what type of punishment was it? .....

27. Did the fear of punishment make you build latrine?

1) Yes

2) No

28. Has there been follow ups after the CLTS trainings/triggering

1) Yes

2) No

29. How frequent are the follow-ups

1) Once a weekly

2) Twice a week

3) Once a month

4) Twice monthly

5) Once a year

6) Don't Know

7) Never

30. Who has been conducting the CLTS follow ups? (*multiple response possible*)

- 1) Government officers
- 2) NGO staff
- 3) Nobody
- 4) Community members/natural leaders
- 5) CHVs/CHWs
- 6) Other, specify. \_\_\_\_\_

31. Do you think the construction of latrines helps in prevention of diseases?

- 1) Yes
- 2) No

32. Can you name for me some of these diseases?

- 1) Diarrhea
- 2) Typhoid
- 3) Cholera
- 4) Intestinal worms
- 5) Other, Specify \_\_\_\_\_

33. Why do you think people practice open defecation in this village? \_\_\_\_\_

---

---

34. What are the situations that have made you or other people not to use latrines in this village?

- 1) Lack of money to construct latrines/poverty
- 2) Lack of information of type of latrines to construct
- 3) Many bushes/open fields
- 4) Latrine filled up
- 5) Soil loose/rocky
- 6) Other, specify. \_\_\_\_\_

## HOUSEHOLD / DWELLING INFORMATION

*Now I am going to ask you a few questions about your household and dwelling.*

35. What type of fuel does your household **mainly** use for cooking? *(Choose one)*

- 1) Electricity
- 2) Natural Gas
- 3) Biogas
- 4) Paraffin / Kerosene
- 5) Charcoal
- 6) Firewood / straw
- 7) Dung
- 8) Other \_\_\_\_\_

36. What is the primary method for lighting the household dwelling(s)? *(This is lighting in the main room, NOT in the kitchen. Choose one)*

- 1) Paraffin (tin and wick)
- 2) Paraffin (Hurricane lantern)
- 3) Electricity
- 4) Solar lamp
- 5) Pressure lamp
- 6) Gas
- 7) Other, specify \_\_\_\_\_

37. How many of the following does the household own? *(Write the number owned next to each asset. Read SENSITIVELY)*

| <i>Type of animal</i> | <i>Number owned</i> |
|-----------------------|---------------------|
| Poultry               |                     |
| Cattle                |                     |
| Goats                 |                     |
| Sheep                 |                     |
| Pigs                  |                     |
| Donkeys               |                     |
| Other, Specify        |                     |

38. Which of the following items does the household have in working order?

|                  |     |    |
|------------------|-----|----|
| Mobile/telephone | Yes | No |
|------------------|-----|----|



|                     |     |    |
|---------------------|-----|----|
| Television          | Yes | No |
| Posho Mill          | Yes | No |
| Gas/Electric cooker | Yes | No |
| Motorcycle          | Yes | No |
| Motor vehicle       | Yes | No |
| Other, specify      |     |    |

## OBSERVATION

1. Main roofing wall and floor material for the latrine:

### Roof

- 1) Grass thatch
- 2) Cement
- 3) Tiles
- 4) Timber
- 5) Iron sheet
- 6) No roof
- 6) Polythene paper
- 7) Bed nets/sheet

### Wall

- 1) Mud
- 2) Cement
- 3) Bricks / Blocks
- 4) Timber
- 5) Metal/iron sheet
- 6) Polythene paper
- 7) Bed nets/sheets
- 8) Gunny bags

### Floor

- 1) Dung / Earthen
- 2) Cement /plaster
- 3) Tile
- 4) Timber

Others, specify: \_\_\_\_\_ -

2. State of repair of the latrine

- 1) Completely dilapidated/ not livable
- 2) Needs major repairs
- 3) Needs no repairs / minor repairs
- 4) Being repaired now
- 5) New latrine under construction

3. Observed feces around compound. 1) Yes 2) No

4. Can you please show me the types of latrines that you are using?

5. Number of functioning latrines observed around compound \_\_\_\_\_ “doors”

6. Type of toilet facility in compound. If more than one, determine newest facility.

- 1) Flush Toilet
- 2) Traditional Pit Latrine
- 3) Traditional Pit with EcoSan
- 4) Ventilated Improved Pit Latrine

- 5) Ventilated Improved Pit with Ecosan
- 6) No Facility / Bush / Field
- 7) Above ground vault
- 8) Slab only

Other Specify \_\_\_\_\_

7. Condition of the latrine most frequently used by members of the household

|                |              |                   |                     |
|----------------|--------------|-------------------|---------------------|
| Smell          | 1) No smell  | 2) smell inside   | 3) smell outside    |
| Cleanliness    | 1) Clean     | 2) Slightly dirty | 3) Feces/Very dirty |
| Flies          | 1) No flies  | 2) A few flies    | 3) Many flies       |
| Superstructure | 1) No cracks | 2) Cracks         | 3) Visible holes    |

8. Condition of slab      1) No cracks      2) Some cracks      3) Pit visible

9. Condition of Door      1) Door closes completely      2) Door closes, but not completely      3) No door

10. Does the latrine hole have a separate lid?      1) Yes      2) No

11. Was the lid covering the hole at the time of the site visit? 1) Yes      2) No

12. What is the condition of the pit?

- 1) The pit is full
- 2) Pit is empty or nearly empty
- 2) Pit is partially full w/ feces
- 3) Feces are visible at or near the top of the pit
- 4) Not applicable

**Thank you for your time. Do you have any questions?**
